# Supplementary material for: Mesenchymal stem cells genetically engineered to express platelet-derived growth factor and heme oxygenase-1 ameliorate osteoarthritis in a canine model
Source: PubMed Central journal article supplement (PMC7802278; doi:10.1186/s13018-020-02178-4), 2021-01-11
Supplement: 13018_2020_2178_MOESM1_ESM.pdf [file 13018_2020_2178_MOESM1_ESM.pdf]

**Additional file 1: Table S1** Primers used for qRT-PCR analysis

| Target genes    | Forward (5'–3')        | Reverse (5'–3')         |
|-----------------|------------------------|-------------------------|
| GAPDH           | CATTGCCCTCAATGACCACT   | TCCTTGGAGGCCATGTAGAC    |
| IL-6            | TTTTCTGCCAGTGCCTCTTT   | GGCTACTGCTTTCCTACCC     |
| IL-1 $\beta$    | AGTTGCAAGTCTCCCACCAG   | TATCCGCATCTGTTTTGCAG    |
| TNF- $\alpha$   | AGCGCTGAGATCAATCTGCC   | TCCAGCCCTGAGCCCTTAAT    |
| COX-2           | ACCCGCCATTATCCTAATCC   | TCGGAGTTCTCCTGGCTTTA    |
| Aggrecan        | ACTGCTCCAGGCGTGTGATG   | GACCATGTCGTGCAGGTGAC    |
| Col1 $\alpha$ 1 | ATCAGCCCTGGAGCATTTACA  | AACTCTTCAGGGGATTGGTG    |
| COL2 $\alpha$ 1 | TACGGTGATGACAACCTGGC   | GTTTCGTGCAGCCATCCTTC    |
| SOX-9           | AGTACCCGCACCTGCACAA    | AAATGTCGCTCTCGGTGG      |
| MMP-1           | TGGAGCACTTCATAGCCAGC   | GAAATGGTGACGCCATGCAG    |
| MMP-3           | ACCCCACTTTGTGGTTCGAC   | ACCGGCTTGTACCTCAGTTC    |
| MMP-13          | CAGCGATGGTGATGATGATCTG | AGGGACCCACATCTTGGT      |
| TIMP-1          | CTCACCAGAGAACCCACCAT   | CCGGTTTAAGTCGGTCTGGT    |
| TIMP-2          | TCCCTGGACATCGGAGGAAA   | CATCCAGAGGCACTCATCCG    |
| ADAMTS-4        | CTCGGACCCTGACCACTTTG   | GAGCATGTTGAAGACGTGGC    |
| ADAMTS-5        | CACCCAGAAACAATGGTCGC   | ACCACGTAGTAACCAGTGCC    |
| NGF             | CTTCGTCCCACCCTGTCTTC   | AGTTCCAGTGCTTGGAGTCG    |
| PDGF-B          | TGTCTCTCTGCTGCTACCTG   | CCAGAATGGGATCGGGTCAA    |
| VEGF            | CTATGGCAGGAGGAGAGCAC   | GCTGCAGGAAACTCATCTCC    |
| TGF- $\beta$    | CTCAGTGCCCACTGTTCTTG   | TCCGTGGAGCTGAAGCAGTA    |
| FGF-2           | TGCCTACCTAGATGCTGGACA  | GAGCTTTGGCCGTATTTCCATTC |
| HGF             | ATGGGGAATGAGAAATGCAG   | GACAAAATGCCAGGACGAT     |
| TSG-6           | AGCCTGCTTGGCTGACTATG   | ATTTGGAAACCTCCCGCTGT    |
| HO-1            | GCGTCGACTTCTTCACCTTC   | GGTCCTCAGTGCCTTGCTC     |
