# Supplementary material for: Mesenchymal stem cells genetically engineered to express platelet-derived growth factor and heme oxygenase-1 ameliorate osteoarthritis in a canine model
Source: PubMed Central journal article supplement (PMC7802278; doi:10.1186/s13018-020-02178-4), 2021-01-11
Supplement: 13018_2020_2178_MOESM2_ESM.pdf [file 13018_2020_2178_MOESM2_ESM.pdf]

**Additional file 2: Table S2** The criteria of orthopaedic examinations

---

| Score criteria                                                                            |
|-------------------------------------------------------------------------------------------|
| Lameness score                                                                            |
| 0. Normal stance and normal lameness                                                      |
| 1. Normal stance, but lameness after exercise                                             |
| 2. Normal stance, but slight lameness when walking                                        |
| 3. Normal or abnormal stance, but moderate lameness when walking                          |
| 4. Abnormal stance and severe lameness when walking                                       |
| 5. Reluctant to rise, stand and walk                                                      |
| Weight bearing score                                                                      |
| 0. Full weight-bearing                                                                    |
| 1. Partial weight-bearing                                                                 |
| 2. Slight weight-bearing                                                                  |
| 3. Toe-touch weight bearing                                                               |
| 4. Intermittent weight-bearing                                                            |
| 5. Non weight-bearing                                                                     |
| Pain score on palpation                                                                   |
| 0. No response                                                                            |
| 1. Tension and spasm of partial thigh muscles                                             |
| 2. Mild tension and spasm of entire thigh muscles and dog turns head in recognition       |
| 3. Moderate tension and spasm of entire thigh muscles and dog pulls limb away             |
| 4. Severe tension and spasm of entire thigh muscles and dog vocalize or become aggressive |

---
