# Supplementary material for: Mesenchymal stem cells genetically engineered to express platelet-derived growth factor and heme oxygenase-1 ameliorate osteoarthritis in a canine model
Source: PubMed Central journal article supplement (PMC7802278; doi:10.1186/s13018-020-02178-4), 2021-01-11
Supplement: 13018_2020_2178_MOESM3_ESM.pdf [file 13018_2020_2178_MOESM3_ESM.pdf]

**Additional file 3: Table S3** The radiographic OA score of stifle joint

---

Score : normal - 0, mild - 1, moderate - 2, severe - 3

---

Factor

1. Osteophyte formation at the proximal / distal edge of the patella
  2. Subchondral sclerosis of the trochlear groove
  3. Osteophyte formation on the fabella
  4. Osteophyte formation in the long digital extensor muscle groove
  5. Subchondral sclerosis of the tibial plateau
  6. Osteophyte formation at the tibial attachment site of the cranial cruciate ligament
  7. Osteophyte formation at the lateral and medial femoral condyle
-
