# Supplementary material for: Mesenchymal stem cells genetically engineered to express platelet-derived growth factor and heme oxygenase-1 ameliorate osteoarthritis in a canine model
Source: PubMed Central journal article supplement (PMC7802278; doi:10.1186/s13018-020-02178-4), 2021-01-11
Supplement: 13018_2020_2178_MOESM4_ESM.pdf [file 13018_2020_2178_MOESM4_ESM.pdf]

**Additional file 4: Table S4** Mean  $\pm$  SD of the serum MMP-13 concentration before and after intra-articular administration.

| Group     | Before treat     | 3 days           | 1 week           | 2 weeks          | 4 weeks          | 10 weeks         |
|-----------|------------------|------------------|------------------|------------------|------------------|------------------|
| Control   | 2.272 $\pm$ 0.81 | 2.007 $\pm$ 0.37 | 2.043 $\pm$ 0.49 | 1.955 $\pm$ 0.31 | 2.091 $\pm$ 0.47 | 1.886 $\pm$ 0.22 |
| MSCs      | 3.452 $\pm$ 0.91 | 2.946 $\pm$ 0.95 | 2.703 $\pm$ 0.18 | 2.559 $\pm$ 0.47 | 2.495 $\pm$ 0.46 | 2.654 $\pm$ 0.67 |
| PDGF-MSCs | 2.141 $\pm$ 0.39 | 2.065 $\pm$ 0.38 | 2.061 $\pm$ 0.41 | 2.118 $\pm$ 0.37 | 2.003 $\pm$ 0.33 | 2.043 $\pm$ 0.35 |
| HO-1-MSCs | 3.386 $\pm$ 0.21 | 3.314 $\pm$ 0.11 | 3.367 $\pm$ 0.12 | 3.284 $\pm$ 0.11 | 3.277 $\pm$ 0.07 | 3.221 $\pm$ 0.10 |
